# Supplementary material for: Why sampling ratio matters: Logistic regression and studies of habitat use
Source: PLoS One. 2018 Jul 23;13(7):e0200742. doi: 10.1371/journal.pone.0200742 (PMC6056037; doi:10.1371/journal.pone.0200742)
Supplement: S1 Table — (CSV) [file pone.0200742.s002.csv]

cavity+AF8-ID	lon	lat	cavity+AF8-height	use
C1	19.125664	48.457832	7.5	0
C2	19.125664	48.457832	10.5	0
C3	19.125664	48.457832	6	0
C4	19.125961	48.45785	6.5	0
C5	19.126695	48.457931	6	0
C6	19.126748	48.458214	11.5	0
C7	19.12696	48.457789	8.5	0
C8	19.127137	48.4577	6	0
C9	19.127137	48.4577	6	0
C10	19.127137	48.4577	9.5	0
C11	19.127137	48.4577	10	0
C12	19.127354	48.45824	7.5	0
C13	19.12744	48.458408	9	0
C14	19.12744	48.458408	13.5	0
C15	19.12835	48.457669	6	0
C16	19.12835	48.457669	6	0
C17	19.128274	48.457752	6.5	0
C18	19.128806	48.457913	4.5	0
C19	19.12844	48.457989	10.5	0
C20	19.128636	48.457893	4.5	0
C21	19.128636	48.457893	5.25	0
C22	19.129138	48.457979	5	0
C23	19.128848	48.458101	5	0
C24	19.128492	48.458447	6.25	0
C25	19.128492	48.458447	4.75	0
C26	19.128391	48.458439	6.75	0
C27	19.128269	48.458469	8.5	0
C28	19.128269	48.458469	6.75	0
C29	19.128014	48.458429	6.25	0
C30	19.128014	48.458429	12.5	0
C31	19.128014	48.458429	11.5	0
C32	19.128753	48.458609	6	0
C33	19.128753	48.458609	4.25	0
C34	19.128753	48.458609	6.5	0
C35	19.128753	48.458609	10.25	0
C36	19.128844	48.458315	5	0
C37	19.128998	48.458294	5	0
C38	19.128998	48.458294	5	0
C39	19.129092	48.458348	1.5	0
C40	19.129092	48.458348	2.25	0
C41	19.129208	48.458615	10.5	0
C42	19.129706	48.458615	4	0
C43	19.129706	48.458615	6.5	0
C44	19.129706	48.458615	9.75	0
C45	19.12971	48.458384	3.75	0
C46	19.12971	48.458384	11.25	0
C47	19.130093	48.458838	3.4	0
C48	19.130093	48.458838	10.5	0
C49	19.130093	48.458838	10	0
C50	19.130093	48.458838	8.5	0
C51	19.130093	48.458838	11.5	0
C52	19.130122	48.458944	6.5	0
C53	19.130776	48.459117	4	0
C54	19.130776	48.459117	5.25	0
C55	19.130849	48.459191	7.75	0
C56	19.130923	48.459248	8.5	0
C57	19.131064	48.45917	5	0
C58	19.131123	48.459277	1.5	0
C59	19.1314	48.459236	7.5	0
C60	19.1314	48.459236	7.5	0
C61	19.131301	48.459363	4.5	0
C62	19.131301	48.459363	2	0
C63	19.131352	48.459387	5.5	0
C64	19.131397	48.459432	8.75	0
C65	19.131397	48.459432	8.75	0
C66	19.131343	48.459503	4.75	0
C67	19.131545	48.459412	5.5	0
C68	19.131545	48.459412	5.5	0
C69	19.131545	48.459412	5.5	0
C70	19.13171	48.459429	7	0
C71	19.13171	48.459429	7	0
C72	19.13171	48.459429	7	0
C73	19.13171	48.459429	7.75	0
C74	19.131812	48.459389	11	0
C75	19.131796	48.459483	12.5	0
C76	19.131796	48.459483	12.5	0
C77	19.131924	48.459562	6	0
C78	19.131924	48.459562	6	0
C79	19.132374	48.460108	6	0
C80	19.132306	48.459244	4.5	0
C81	19.132164	48.459159	11	0
C82	19.132164	48.459159	11	0
C83	19.132581	48.458917	3.8	0
C84	19.132581	48.458917	6.6	0
C85	19.132556	48.458914	6.5	0
C86	19.132134	48.45902	7	0
C87	19.131836	48.459056	3.5	0
C88	19.132033	48.458797	5.5	0
C89	19.131877	48.458709	6	0
C90	19.131877	48.458709	7.5	0
C91	19.131877	48.458709	13.5	0
C92	19.1321	48.458714	5.25	0
C93	19.132118	48.458637	5.25	0
C94	19.132197	48.45859	7	0
C95	19.132197	48.458374	3.25	0
C96	19.131781	48.458183	4	0
C97	19.131306	48.458707	4	0
C98	19.131302	48.458727	3	0
C99	19.131302	48.458727	11.5	0
C100	19.131196	48.458934	4	0
C101	19.131196	48.458934	6	0
C102	19.131113	48.458858	12.5	0
C103	19.131012	48.458852	4	0
C104	19.130653	48.458664	6.5	0
C105	19.130653	48.458664	3.5	0
C106	19.130653	48.458664	3.5	0
C107	19.125479	48.458086	14	0
C108	19.125788	48.458187	4.25	0
C109	19.127903	48.459018	9	1
C110	19.128545	48.458963	7	0
C111	19.129613	48.45892	6	0
C112	19.129949	48.459146	6.75	0
C113	19.130389	48.459359	7.5	0
C114	19.130389	48.459359	7.5	0
C115	19.130389	48.459359	7.75	0
C116	19.130411	48.459504	5.25	0
C117	19.130605	48.459786	5.75	0
C118	19.130892	48.459694	3.25	0
C119	19.131047	48.459737	3	0
C120	19.131724	48.460243	5	0
C121	19.131724	48.460243	5	0
C122	19.131724	48.460243	4	0
C123	19.131974	48.460462	9	0
C124	19.13243	48.460579	14	0
C125	19.13224	48.460786	4.25	0
C126	19.13173	48.460585	6.5	0
C127	19.13173	48.460585	7.5	0
C128	19.131036	48.460554	7.75	0
C129	19.131036	48.460554	5	0
C130	19.130765	48.460155	6.5	0
C131	19.130621	48.460033	6	0
C132	19.130524	48.460142	3.5	0
C133	19.130444	48.460121	4.75	0
C134	19.130444	48.460121	4.75	0
C135	19.130444	48.460121	4	0
C136	19.130218	48.460159	8.25	0
C137	19.130218	48.460159	8.75	0
C138	19.13027	48.460282	5	0
C139	19.129748	48.460223	9.75	0
C140	19.129679	48.460296	7.5	0
C141	19.129552	48.460452	7.75	0
C142	19.129747	48.460118	7.25	0
C143	19.129981	48.4598	11	0
C144	19.129981	48.4598	6.75	0
C145	19.129981	48.4598	6.5	0
C146	19.129627	48.459385	8.5	0
C147	19.128345	48.459647	4	0
C148	19.128345	48.459647	9.5	0
C149	19.127794	48.459582	5.5	0
C150	19.128148	48.459951	3	0
C151	19.128667	48.459807	5	0
C152	19.128667	48.459807	6	0
C153	19.129454	48.459738	7.5	0
C154	19.129454	48.459738	4.25	0
C155	19.12759	48.460241	11	0
C156	19.127803	48.46052	9.5	0
C157	19.127848	48.460772	5.5	0
C158	19.127848	48.460772	10	0
C159	19.127973	48.460829	1.5	0
C160	19.127973	48.460829	6	0
C161	19.127973	48.460829	5	0
C162	19.127973	48.460829	3.25	0
C163	19.127939	48.461084	5.7	0
C164	19.127939	48.461084	4.75	1
C165	19.128097	48.46114	5.75	0
C166	19.12748	48.46104	7.5	0
C167	19.12748	48.46104	7.75	0
C168	19.127398	48.461431	11.25	0
C169	19.127069	48.461702	4.5	0
C170	19.127389	48.46199	2.25	0
C171	19.127007	48.462056	11.5	0
C172	19.12699	48.462531	2.5	0
C173	19.126916	48.462669	8	0
C174	19.12662	48.462805	3.75	0
C175	19.126329	48.462791	10.5	0
C176	19.125946	48.462849	4.5	0
C177	19.128783	48.45996	5.5	0
C178	19.128783	48.45996	7.75	0
C179	19.128963	48.460084	7	0
C180	19.128651	48.460342	6	0
C181	19.128431	48.46037	8	0
C182	19.128216	48.46049	9.5	0
C183	19.128216	48.46049	7.5	0
C184	19.128216	48.46049	7.5	0
C185	19.128515	48.460939	13	0
C186	19.129042	48.460616	7	0
C187	19.129525	48.460818	8	0
C188	19.129525	48.460818	5.75	0
C189	19.129525	48.460818	6	0
C190	19.129375	48.460959	6.5	0
C191	19.129113	48.460891	5.5	0
C192	19.129113	48.460891	12.25	0
C193	19.129113	48.460891	5.5	0
C194	19.129113	48.460891	8.5	0
C195	19.129121	48.460881	8.5	0
C196	19.128883	48.46104	5.25	0
C197	19.127821	48.461337	4	0
C198	19.127821	48.461337	4	0
C199	19.127821	48.461337	5	0
C200	19.128824	48.461401	5.5	0
C201	19.128824	48.461401	5.5	0
C202	19.128824	48.461401	5.5	0
C203	19.128824	48.461401	6.5	0
C204	19.128531	48.461467	5.5	0
C205	19.129297	48.461482	3	0
C206	19.129297	48.461482	4.25	0
C207	19.129297	48.461482	4.25	0
C208	19.129297	48.461482	8.25	1
C209	19.129418	48.461541	4	0
C210	19.129418	48.461541	4	0
C211	19.129418	48.461541	4	0
C212	19.129088	48.461871	5.75	0
C213	19.129088	48.461871	7.5	0
C214	19.129342	48.462215	6.25	0
C215	19.128693	48.462277	8	0
C216	19.128693	48.462277	8	0
C217	19.128693	48.462277	5.75	0
C218	19.128527	48.462394	3.25	0
C219	19.127228	48.462464	9.75	0
C220	19.127228	48.462464	4	0
C221	19.127196	48.462322	7	0
C222	19.127251	48.46222	8	0
C223	19.128093	48.461613	7.25	0
C224	19.128093	48.461613	7.25	0
C225	19.128093	48.461613	7.25	0
C226	19.127938	48.46184	6	0
C227	19.127786	48.461984	7	0
C228	19.127786	48.461984	9.75	0
C229	19.127902	48.462085	9.25	0
C230	19.12834	48.461655	5.25	0
C231	19.12834	48.461655	5.25	0
C232	19.12834	48.461655	4.5	0
C233	19.12834	48.461655	3.75	0
C234	19.128443	48.461738	5.75	0
C235	19.128399	48.461991	17	1
C236	19.129587	48.460454	4.75	0
C237	19.129587	48.460454	4.75	0
C238	19.129587	48.460454	7.5	0
C239	19.129579	48.46063	5.75	0
C240	19.129579	48.46063	5.75	0
C241	19.129579	48.46063	5.75	0
C242	19.129579	48.46063	5.75	0
C243	19.129579	48.46063	5.75	0
C244	19.129579	48.46063	5.25	0
C245	19.129579	48.46063	2.1	0
C246	19.129696	48.460652	5.75	0
C247	19.129696	48.460652	6	0
C248	19.129696	48.460652	6	0
C249	19.12984	48.460763	5.25	0
C250	19.129911	48.460868	7.25	0
C251	19.129911	48.460868	9.75	0
C252	19.129804	48.461011	8	0
C253	19.129946	48.460962	9	0
C254	19.129893	48.461223	9	0
C255	19.129893	48.461223	9	0
C256	19.129893	48.461223	11.5	0
C257	19.13006	48.461418	2.75	0
C258	19.13006	48.461418	3.5	0
C259	19.13006	48.461418	8.75	0
C260	19.129638	48.461826	4	0
C261	19.129638	48.461826	4	0
C262	19.129526	48.462065	6.75	1
C263	19.129526	48.462065	5.75	1
C264	19.129852	48.462108	4.75	0
C265	19.129852	48.462108	4.75	0
C266	19.129664	48.462246	6	0
C267	19.129664	48.462246	6	0
C268	19.130114	48.462389	5.5	0
C269	19.130114	48.462389	3.5	0
C270	19.129968	48.462464	4	0
C271	19.129846	48.462739	6	0
C272	19.129846	48.462739	6	0
C273	19.129733	48.462744	11.5	0
C274	19.129733	48.462744	11.7	0
C275	19.129733	48.462744	11.7	0
C276	19.130198	48.460729	3.75	0
C277	19.13029	48.460741	5.75	0
C278	19.13029	48.460741	4.25	0
C279	19.13029	48.460741	5	0
C280	19.13029	48.460741	5	0
C281	19.130472	48.461266	7.25	0
C282	19.130472	48.461266	7.25	0
C283	19.130472	48.461266	4.25	0
C284	19.130374	48.461452	8	0
C285	19.130137	48.461428	9	0
C286	19.130137	48.461428	3.25	0
C287	19.130481	48.461551	8.5	0
C288	19.130481	48.461551	8.5	0
C289	19.130481	48.461551	6.75	0
C290	19.130481	48.461551	8.5	0
C291	19.130383	48.461961	3.25	0
C292	19.130383	48.461961	7.5	0
C293	19.130383	48.461961	7.5	0
C294	19.130383	48.461961	9.5	0
C295	19.130383	48.461961	3.5	0
C296	19.130399	48.462209	12.5	0
C297	19.13018	48.462274	9.75	0
C298	19.130216	48.46233	3.5	0
C299	19.130664	48.460913	5.5	0
C300	19.130854	48.461045	8	0
C301	19.130885	48.461276	2	0
C302	19.130885	48.461276	11	1
C303	19.130754	48.461628	4.75	0
C304	19.130754	48.461628	3.5	0
C305	19.130839	48.461708	6.25	0
C306	19.130992	48.462023	3.25	0
C307	19.130992	48.462023	5	0
C308	19.130992	48.462023	6.5	0
C309	19.130992	48.462023	8.25	0
C310	19.130992	48.462023	10	1
C311	19.13101	48.46226	3.5	0
C312	19.130853	48.462384	4.5	0
C313	19.130853	48.462384	5.25	0
C314	19.130853	48.462384	5.25	0
C315	19.126737	48.463264	4	0
C316	19.12664	48.463346	3.5	0
C317	19.126738	48.463549	10	0
C318	19.126727	48.463706	6.75	0
C319	19.126727	48.463706	5	0
C320	19.12718	48.46367	11.5	0
C321	19.128518	48.464456	5	0
C322	19.129177	48.464455	7.5	0
C323	19.129177	48.464455	7	0
C324	19.129529	48.465104	7.75	0
C325	19.129529	48.465104	7.75	0
C326	19.129059	48.463963	7.25	0
C327	19.129059	48.463963	5.5	0
C328	19.129059	48.463963	7.5	0
C329	19.129059	48.463963	6	0
C330	19.128703	48.463959	5.75	0
C331	19.128703	48.463959	5	0
C332	19.128703	48.463959	4.25	0
C333	19.128703	48.463959	8.75	0
C334	19.128703	48.463959	9.5	0
C335	19.128367	48.463637	7.75	0
C336	19.128367	48.463637	7	0
C337	19.128086	48.463625	8	0
C338	19.128086	48.463625	8.75	0
C339	19.128086	48.463625	10	0
C340	19.128086	48.463625	11.25	0
C341	19.127986	48.463272	8.5	1
C342	19.12796	48.46309	6.5	0
C343	19.12796	48.46309	8.75	0
C344	19.12796	48.46309	8.75	0
C345	19.127499	48.463141	5.75	0
C346	19.127238	48.463191	8.5	0
C347	19.127147	48.462876	3.5	0
C348	19.127389	48.462731	10.5	0
C349	19.127389	48.462731	10	0
C350	19.127389	48.462731	11.75	0
C351	19.127386	48.462935	8	0
C352	19.127386	48.462935	8	0
C353	19.127386	48.462935	8	0
C354	19.127859	48.462966	12.5	0
C355	19.128047	48.46297	9.25	0
C356	19.128263	48.463045	3.25	0
C357	19.127744	48.46256	7	0
C358	19.127744	48.46256	9	0
C359	19.128144	48.462635	4.25	0
C360	19.128617	48.46259	9	0
C361	19.128617	48.46259	4.5	0
C362	19.128885	48.46278	8.75	0
C363	19.128885	48.46278	8.75	0
C364	19.128885	48.46278	8.25	0
C365	19.128885	48.46278	7.75	0
C366	19.128885	48.46278	7.75	0
C367	19.128885	48.46278	10.5	0
C368	19.128532	48.463185	7	0
C369	19.128532	48.463185	6	0
C370	19.128532	48.463185	5.75	0
C371	19.128532	48.463185	5.75	0
C372	19.128532	48.463185	5.25	0
C373	19.128532	48.463185	6.25	0
C374	19.128532	48.463185	6.75	0
C375	19.128794	48.46365	9.5	0
C376	19.128794	48.46365	8.5	0
C377	19.128871	48.46351	11.25	0
C378	19.128871	48.46351	8.5	0
C379	19.132119	48.46705	8	0
C380	19.133126	48.467287	9.75	0
C381	19.133082	48.467862	13	0
C382	19.13398	48.468159	5.5	0
C383	19.13398	48.468159	5.5	0
C384	19.13398	48.468159	5.5	0
C385	19.13398	48.468159	5.5	0
C386	19.13398	48.468159	5.5	0
C387	19.134136	48.468066	6.5	1
C388	19.133783	48.468383	3.5	0
C389	19.133783	48.468383	9.5	0
C390	19.134443	48.468251	3.75	0
C391	19.134443	48.468251	8.5	0
C392	19.134815	48.468552	5.75	0
C393	19.134815	48.468552	6.15	0
C394	19.134971	48.468726	5.75	0
C395	19.135315	48.468563	6	0
C396	19.135315	48.468563	9	0
C397	19.135315	48.468563	7.75	0
C398	19.135315	48.468563	5	0
C399	19.135566	48.468523	7	0
C400	19.135566	48.468523	4.5	0
C401	19.135865	48.46872	4.75	0
C402	19.135865	48.46872	6.5	0
C403	19.135401	48.469053	4.5	0
C404	19.135375	48.469118	12.5	0
C405	19.134881	48.46935	3.5	0
C406	19.134881	48.46935	4	0
C407	19.134881	48.46935	7.75	0
C408	19.135121	48.469595	8.5	0
C409	19.135121	48.469595	8.5	0
C410	19.135136	48.470156	9.75	0
C411	19.136097	48.47031	9.5	0
C412	19.136309	48.46931	5.5	0
C413	19.136381	48.46956	2.5	0
C414	19.136381	48.46956	7	0
C415	19.136598	48.470021	11.75	0
C416	19.136598	48.470021	11	0
C417	19.136598	48.470021	11	0
C418	19.136598	48.470021	11.5	0
C419	19.136723	48.469878	9.25	0
C420	19.136723	48.469878	8.25	0
C421	19.136723	48.469878	6.5	0
C422	19.136723	48.469878	6.5	0
C423	19.136723	48.469878	4	0
C424	19.136727	48.469586	8.5	0
C425	19.13692	48.469521	5.5	1
C426	19.13692	48.469521	6.5	1
C427	19.136915	48.46926	7.75	0
C428	19.136915	48.46926	7.75	0
C429	19.136915	48.46926	4.5	0
C430	19.136915	48.46926	3	0
C431	19.137145	48.470114	2.25	0
C432	19.137507	48.470208	4.5	0
C433	19.137507	48.470208	5.25	0
C434	19.137191	48.469705	5	0
C435	19.1375	48.469722	2.25	0
C436	19.137809	48.469671	5.25	0
C437	19.138352	48.469981	2.25	0
C438	19.138352	48.469981	5.5	0
C439	19.137901	48.470746	8.5	0
C440	19.138529	48.47106	6.25	0
C441	19.138529	48.47106	5.5	0
C442	19.137862	48.471765	7.25	0
C443	19.137862	48.471765	3.5	0
C444	19.137862	48.471765	8.5	0
C445	19.137862	48.471765	6	0
C446	19.13801	48.471868	4.75	0
C447	19.138271	48.471908	7.25	0
C448	19.138271	48.471908	7	0
C449	19.138271	48.471908	5.5	0
C450	19.138271	48.471908	5.5	0
C451	19.139125	48.472426	8	0
C452	19.14115	48.471326	8.5	0
C453	19.14115	48.471326	8.75	0
C454	19.14115	48.471326	9	0
C455	19.14115	48.471326	9.5	0
C456	19.14115	48.471326	9.75	0
C457	19.14115	48.471326	10	0
C458	19.14115	48.471326	11	0
C459	19.14115	48.471326	8.5	0
C460	19.140836	48.471496	3.5	0
C461	19.140836	48.471496	6.5	0
C462	19.140836	48.471496	6.5	0
C463	19.140836	48.471496	8.5	0
C464	19.140836	48.471496	8.5	0
C465	19.140836	48.471496	7.75	0
C466	19.140444	48.471357	7.5	0
C467	19.14093	48.470998	4	0
C468	19.14093	48.470998	6	0
C469	19.14093	48.470998	5	0
C470	19.139876	48.47029	4.25	0
C471	19.139876	48.47029	1.75	0
C472	19.134025	48.461524	5.75	0
C473	19.134025	48.461524	8	0
C474	19.133672	48.462117	5.25	0
C475	19.133672	48.462117	5.25	0
C476	19.13362	48.462585	2.25	0
C477	19.13362	48.462585	9.5	0
C478	19.13362	48.462585	3.5	0
C479	19.13362	48.462585	8.5	0
C480	19.133622	48.462625	6	0
C481	19.133622	48.462625	6	0
C482	19.133522	48.462611	5.5	0
C483	19.132965	48.462679	4.25	0
C484	19.133254	48.462301	3.25	0
C485	19.132597	48.462251	4	0
C486	19.132669	48.462249	5.25	0
C487	19.132669	48.462249	7.25	0
C488	19.132669	48.462249	9.25	0
C489	19.132669	48.462249	9.25	0
C490	19.132669	48.462249	9.25	0
C491	19.132669	48.462249	9.75	0
C492	19.132669	48.462249	10.25	0
C493	19.132669	48.462249	10.75	0
C494	19.132669	48.462249	5.75	0
C495	19.132151	48.462378	9.75	0
C496	19.132151	48.462378	8.5	0
C497	19.132151	48.462378	9	0
C498	19.132151	48.462378	9	0
C499	19.132151	48.462378	7.75	0
C500	19.13291	48.462025	5.25	0
C501	19.133044	48.46165	4.75	0
C502	19.133104	48.461449	7.5	0
C503	19.133104	48.461449	8.25	0
C504	19.133104	48.461449	8.25	0
C505	19.133104	48.461449	9.25	0
C506	19.133104	48.461449	6.5	0
C507	19.13324	48.461139	9	0
C508	19.13324	48.461139	9	0
C509	19.133023	48.460927	10	0
C510	19.133023	48.460927	10	0
C511	19.132689	48.461546	12.5	0
C512	19.132689	48.461546	12.5	0
C513	19.132689	48.461546	12.5	0
C514	19.13259	48.461579	1.7	0
C515	19.13259	48.461579	6.5	0
C516	19.13259	48.461579	5.5	0
C517	19.13259	48.461579	6.75	0
C518	19.132462	48.461707	7	0
C519	19.132462	48.461707	13.5	0
C520	19.132462	48.461707	13.5	0
C521	19.132101	48.461639	10	1
C522	19.132101	48.461639	10.25	1
C523	19.132063	48.461714	3.25	0
C524	19.132063	48.461714	9.75	0
C525	19.131694	48.461767	5	0
C526	19.131694	48.461767	5	0
C527	19.131694	48.461767	6.5	0
C528	19.131303	48.461746	8	1
C529	19.131303	48.461746	8	0
C530	19.131303	48.461746	3.75	0
C531	19.131303	48.461746	7	0
C532	19.131303	48.461746	7.25	0
C533	19.131303	48.461746	6.5	0
C534	19.131303	48.461746	9.75	0
C535	19.131303	48.461746	9.75	0
C536	19.131303	48.461746	11.5	0
C537	19.131532	48.462009	4	0
C538	19.131532	48.462009	3.75	0
C539	19.131532	48.462009	5.5	0
C540	19.131532	48.462009	3.75	0
C541	19.131681	48.462	5.75	0
C542	19.131245	48.461967	5.5	0
C543	19.131099	48.461986	3.75	0
C544	19.131099	48.461986	5.5	0
C545	19.131099	48.461986	8.75	0
C546	19.130806	48.462635	5.5	0
C547	19.131236	48.462611	5.5	0
C548	19.131236	48.462611	7	0
C549	19.132077	48.461308	9	0
C550	19.131668	48.460749	9.5	0
C551	19.131802	48.461004	4.5	0
C552	19.131603	48.461068	4	0
C553	19.131603	48.461068	4.5	0
C554	19.131404	48.461106	7.5	1
C555	19.131404	48.461106	4	0
C556	19.131404	48.461106	6	0
C557	19.131342	48.460734	7	0
C558	19.131115	48.460819	4.75	0
C559	19.130865	48.460736	8	0
C560	19.130135	48.462991	2.5	0
C561	19.131608	48.463204	8	0
C562	19.131608	48.463204	8	0
C563	19.131608	48.463204	6.75	0
C564	19.131608	48.463204	6.75	0
C565	19.130802	48.463495	8.5	0
C566	19.130802	48.463495	8.5	0
C567	19.130802	48.463495	8.5	0
C568	19.130379	48.463265	8.5	0
C569	19.130379	48.463265	8.5	0
C570	19.130379	48.463265	9.25	0
C571	19.130379	48.463265	9.25	0
C572	19.130379	48.463265	12	0
C573	19.129658	48.463354	5.75	0
C574	19.129658	48.463354	6.5	0
C575	19.129658	48.463354	10.5	0
C576	19.129658	48.463354	5.75	1
C577	19.129721	48.463192	10	0
C578	19.129721	48.463192	10	0
C579	19.129721	48.463192	10	0
C580	19.129721	48.463192	10	0
C581	19.129247	48.463641	4.5	0
C582	19.129591	48.464008	4.5	0
C583	19.129591	48.464008	4.5	0
C584	19.129818	48.464243	3.5	0
C585	19.130841	48.464553	4.5	0
C586	19.130446	48.46438	10.5	0
C587	19.130253	48.464145	8	0
C588	19.130083	48.46397	5.25	0
C589	19.130083	48.46397	4.5	0
C590	19.130808	48.464232	12.25	0
C591	19.130808	48.464232	4.75	0
C592	19.130808	48.464232	4.75	0
C593	19.131244	48.464329	5.75	0
C594	19.131476	48.464341	6.5	0
C595	19.131476	48.464341	5.5	0
C596	19.131476	48.464341	4.75	0
C597	19.131588	48.464356	6	1
C598	19.131588	48.464356	5.75	1
C599	19.131812	48.464166	2.1	0
C600	19.131812	48.464166	6.5	0
C601	19.131907	48.464135	2.75	0
C602	19.13195	48.464292	7.75	1
C603	19.132026	48.464341	5.25	0
C604	19.132408	48.46394	8.75	0
C605	19.132408	48.46394	10.5	0
C606	19.132408	48.46394	4.75	0
C607	19.132408	48.46394	8.75	0
C608	19.131489	48.463547	8.5	0
C609	19.131489	48.463547	8.5	0
C610	19.131489	48.463547	11.5	0
C611	19.131489	48.463547	9	0
C612	19.131489	48.463547	9.75	0
C613	19.131489	48.463547	9.75	0
C614	19.131489	48.463547	7.75	0
C615	19.131489	48.463547	7.25	0
C616	19.131489	48.463547	7.25	0
C617	19.131489	48.463547	7.5	0
C618	19.131489	48.463547	11.25	0
C619	19.131489	48.463547	5.5	0
C620	19.131489	48.463547	9.5	0
C621	19.130845	48.463887	6	0
C622	19.130845	48.463887	12	0
C623	19.130845	48.463887	12	0
C624	19.131624	48.465161	8	0
C625	19.131624	48.465161	5	0
C626	19.130777	48.46503	4	0
C627	19.131083	48.465342	8.75	0
C628	19.131083	48.465342	12.25	0
C629	19.130325	48.465249	9.5	0
C630	19.130325	48.465249	10.5	0
C631	19.130325	48.465249	12	0
C632	19.133939	48.467281	4	0
C633	19.133939	48.467281	7.75	1
C634	19.134191	48.467285	7.75	1
C635	19.134191	48.467285	7.75	0
C636	19.134191	48.467285	12	0
C637	19.134191	48.467285	8.75	0
C638	19.134191	48.467285	14	0
C639	19.134833	48.467295	7	0
C640	19.134833	48.467295	8.25	0
C641	19.134574	48.467757	6.5	0
C642	19.134898	48.467997	3.5	0
C643	19.134898	48.467997	1.5	0
C644	19.134898	48.467997	4.25	0
C645	19.134898	48.467997	6	0
C646	19.134898	48.467997	2.25	0
C647	19.134898	48.467997	5	0
C648	19.135501	48.468416	3	0
C649	19.135501	48.468416	3	0
C650	19.135996	48.468626	5.5	0
C651	19.135996	48.468626	6	0
C652	19.136064	48.468652	5.5	0
C653	19.136324	48.468845	7.5	0
C654	19.136324	48.468845	12.75	0
C655	19.137141	48.468893	10.25	0
C656	19.137141	48.468893	10.25	0
C657	19.137141	48.468893	7.75	0
C658	19.137141	48.468893	8.75	0
C659	19.137437	48.468835	10.5	0
C660	19.137448	48.468756	10.5	0
C661	19.137788	48.46872	7.75	0
C662	19.137788	48.46872	8	0
C663	19.137247	48.468642	1.7	0
C664	19.137247	48.468642	8.5	0
C665	19.138801	48.468871	6.25	0
C666	19.139409	48.468921	10.75	0
C667	19.140414	48.470392	6.5	0
C668	19.140849	48.47019	12	0
C669	19.140849	48.47019	8	0
C670	19.141406	48.470843	6.5	0
C671	19.141406	48.470843	5.25	0
C672	19.141406	48.470843	7.75	0
C673	19.139616	48.469932	5	0
C674	19.139616	48.469932	6.5	0
C675	19.139513	48.469854	3.5	0
C676	19.138964	48.46945	9.5	0
C677	19.138964	48.46945	5.75	0
C678	19.138964	48.46945	6.75	0
C679	19.138036	48.468555	4.25	0
C680	19.138036	48.468555	3.75	0
C681	19.138304	48.46834	5	0
C682	19.138222	48.468142	3.5	0
C683	19.137927	48.468209	5	0
C684	19.13778	48.468165	7	0
C685	19.13778	48.468165	10.5	0
C686	19.138715	48.468182	3.5	0
C687	19.138715	48.468182	7	0
C688	19.138715	48.468182	9.5	0
C689	19.138715	48.468182	12.5	0
C690	19.138715	48.468182	9.25	0
C691	19.138715	48.468182	9.25	0
C692	19.138422	48.467824	13.5	0
C693	19.138538	48.467765	3.5	0
C694	19.138538	48.467765	14	0
C695	19.138654	48.467765	13	0
C696	19.138654	48.467765	9.5	0
C697	19.138608	48.467618	13	0
C698	19.136353	48.467931	6	0
C699	19.136075	48.467892	4	0
C700	19.13591	48.467995	3	0
C701	19.13591	48.467995	6	0
C702	19.135602	48.468016	4	0
C703	19.135602	48.468016	8.75	0
C704	19.135602	48.468016	7.25	0
C705	19.135602	48.468016	5.5	0
C706	19.135602	48.468016	7.5	0
C707	19.135631	48.467872	10	0
C708	19.135349	48.467937	4.25	0
C709	19.136002	48.467544	7.5	0
C710	19.136002	48.467544	9	0
C711	19.136002	48.467544	10	0
C712	19.136002	48.467544	11.5	0
C713	19.136002	48.467544	12.25	0
C714	19.136133	48.46735	9.5	0
C715	19.137067	48.467716	10.5	0
C716	19.137142	48.467691	5.5	0
C717	19.136023	48.467105	6	0
C718	19.138339	48.465949	4.5	0
C719	19.138478	48.465564	6	0
C720	19.138478	48.465564	8.5	0
C721	19.138478	48.465564	7.5	0
C722	19.138693	48.465471	8.5	0
C723	19.138596	48.465375	9.5	0
C724	19.138596	48.465375	9.5	0
C725	19.138201	48.46523	8.5	0
C726	19.137953	48.465608	6.5	0
C727	19.137953	48.465608	13.5	0
C728	19.137492	48.465461	9	0
C729	19.137623	48.465248	7	0
C730	19.137623	48.465248	7	0
C731	19.137623	48.465248	12	0
C732	19.137623	48.465248	6	0
C733	19.137623	48.465248	5.5	0
C734	19.137011	48.465226	5.5	0
C735	19.137011	48.465226	5.5	0
C736	19.137011	48.465226	8	0
C737	19.136643	48.465294	5.5	0
C738	19.136643	48.465294	5.5	0
C739	19.136482	48.465153	7	0
C740	19.136306	48.465269	3.5	0
C741	19.135549	48.465636	4	0
C742	19.135549	48.465636	11.5	0
C743	19.136398	48.465265	8.5	0
C744	19.134794	48.465562	6.5	0
C745	19.134794	48.465562	7	0
C746	19.134051	48.465456	3.75	0
C747	19.13428	48.465103	4.5	0
C748	19.13428	48.465103	5.5	0
C749	19.135084	48.465441	5.5	0
C750	19.134494	48.464822	12	0
C751	19.134494	48.464822	8.5	0
C752	19.134494	48.464822	8.5	0
C753	19.134494	48.464822	6.5	0
C754	19.134494	48.464822	6.5	0
C755	19.134494	48.464822	9	0
C756	19.134494	48.464822	10	0
C757	19.134415	48.46463	7	0
C758	19.134415	48.46463	8.5	0
C759	19.134783	48.464702	5.5	0
C760	19.134619	48.464516	5	0
C761	19.134619	48.464516	5	0
C762	19.134619	48.464516	5	0
C763	19.134619	48.464516	5	0
C764	19.134619	48.464516	5	0
C765	19.134619	48.464516	4	0
C766	19.134619	48.464516	4	0
C767	19.134619	48.464516	4	0
C768	19.13536	48.46493	5.5	0
C769	19.13536	48.46493	5.5	0
C770	19.13536	48.46493	5.5	0
C771	19.13536	48.46493	5.5	0
C772	19.135354	48.465143	3.5	0
C773	19.135354	48.465143	5.5	0
C774	19.135354	48.465143	2.5	0
C775	19.135354	48.465143	10	0
C776	19.135354	48.465143	10	0
C777	19.135354	48.465143	10	0
C778	19.135354	48.465143	10.5	0
C779	19.135354	48.465143	10.5	0
C780	19.135354	48.465143	10.5	0
C781	19.135354	48.465143	10.5	0
C782	19.135354	48.465143	10.5	0
C783	19.135354	48.465143	10.5	0
C784	19.135354	48.465143	10.5	0
C785	19.135354	48.465143	10.5	0
C786	19.135354	48.465143	10.5	0
C787	19.135521	48.465039	7.5	0
C788	19.135521	48.465039	6.5	0
C789	19.136736	48.465143	12	0
C790	19.136736	48.465143	9	0
C791	19.136736	48.465143	9.5	0
C792	19.136736	48.465143	11.5	0
C793	19.136736	48.465143	11.5	0
C794	19.136736	48.465143	11.5	0
C795	19.13674	48.465042	4.5	0
C796	19.136661	48.464945	6.5	0
C797	19.136661	48.464945	5	0
C798	19.136839	48.464821	3.5	0
C799	19.136839	48.464821	4	0
C800	19.136839	48.464821	6	0
C801	19.136839	48.464821	10.5	0
C802	19.137072	48.465062	5.5	0
C803	19.136972	48.464484	11.5	1
C804	19.136972	48.464484	4.5	0
C805	19.136678	48.464378	4	0
C806	19.136644	48.463878	6	0
C807	19.136644	48.463878	7.5	0
C808	19.137367	48.463622	7	0
C809	19.137367	48.463622	8.5	0
C810	19.137367	48.463622	7	0
C811	19.137569	48.463199	7.5	0
C812	19.137569	48.463199	11	0
C813	19.137569	48.463199	11	0
C814	19.13717	48.463135	5.5	0
C815	19.136971	48.463133	5.5	0
C816	19.136971	48.463133	5	1
C817	19.136971	48.463133	5	1
C818	19.136971	48.463133	7	0
C819	19.136971	48.463133	7.5	0
C820	19.136971	48.463133	8.5	0
C821	19.136971	48.463133	6.5	0
C822	19.136971	48.463133	6.5	0
C823	19.136653	48.463143	5	0
C824	19.13639	48.46303	7	0
C825	19.136588	48.462523	5.5	0
C826	19.137273	48.462332	3	0
C827	19.137273	48.462332	9	0
C828	19.137273	48.462332	8.5	0
C829	19.137273	48.462332	11	0
C830	19.138062	48.462119	9.5	0
C831	19.138062	48.462119	9.75	0
C832	19.138062	48.462119	10.5	0
C833	19.138062	48.462119	11	0
C834	19.138062	48.462119	6	0
C835	19.137982	48.462617	6	0
C836	19.138066	48.463134	5	0
C837	19.138262	48.462962	6.5	0
C838	19.138262	48.462962	7	0
C839	19.138224	48.463318	8.5	0
C840	19.138224	48.463318	8.5	0
C841	19.138224	48.463318	6	0
C842	19.13844	48.463412	8.5	0
C843	19.139009	48.464159	5.5	0
C844	19.138995	48.464632	6.5	0
C845	19.138378	48.466633	4	0
C846	19.13863	48.466446	7.5	0
C847	19.13863	48.466446	7	0
C848	19.138432	48.466317	4	0
C849	19.138286	48.466384	8	0
C850	19.136858	48.466758	6	0
C851	19.136858	48.466758	7.5	0
C852	19.136374	48.466568	4.25	0
C853	19.136297	48.466743	6	0
C854	19.136462	48.466885	4.5	0
C855	19.136295	48.466907	8	0
C856	19.136055	48.466921	5	0
C857	19.136055	48.466921	5.5	0
C858	19.135485	48.466798	11.5	0
C859	19.135485	48.466798	11.5	0
C860	19.135534	48.466629	5	0
C861	19.135534	48.466629	5	0
C862	19.135534	48.466629	2	0
C863	19.135534	48.466629	2	0
C864	19.134873	48.466939	5.5	0
C865	19.132701	48.466776	2.5	0
C866	19.132701	48.466776	6	0
C867	19.132701	48.466776	10	0
C868	19.132652	48.466827	5.5	0
C869	19.133144	48.466683	5	0
C870	19.133144	48.466683	4.75	0
C871	19.133144	48.466683	5.75	0
C872	19.133075	48.466235	6.75	0
C873	19.133407	48.466472	4.5	0
C874	19.133582	48.46658	6.5	0
C875	19.133582	48.46658	6	0
C876	19.133582	48.46658	5.25	0
C877	19.133582	48.46658	5.5	0
C878	19.133647	48.466708	7.75	1
C879	19.134004	48.466435	11	0
C880	19.133679	48.466302	4.75	0
C881	19.13368	48.465896	3.75	0
C882	19.133811	48.465993	4.5	0
C883	19.133811	48.465993	4.5	0
C884	19.134069	48.466044	13	1
C885	19.134069	48.466044	14	1
C886	19.134069	48.466044	3	0
C887	19.134513	48.466217	5	0
C888	19.134513	48.466217	6	0
C889	19.134513	48.466217	11	0
C890	19.134464	48.466348	3.5	0
C891	19.134677	48.466452	9	0
C892	19.134677	48.466452	9.5	0
C893	19.134677	48.466452	11.5	0
C894	19.134474	48.4667	4	1
C895	19.134474	48.4667	7	0
C896	19.134474	48.4667	6.75	0
C897	19.134474	48.4667	9	0
C898	19.135458	48.466172	5.5	0
C899	19.135458	48.466172	10	0
C900	19.135842	48.466271	3.75	0
C901	19.135842	48.466271	8.5	0
C902	19.136195	48.466056	7.5	0
C903	19.136195	48.466056	6	0
C904	19.136197	48.466328	3.5	0
C905	19.136976	48.466026	9	0
C906	19.136978	48.46588	6.75	0
C907	19.136978	48.46588	7.25	0
C908	19.136978	48.46588	7.5	0
C909	19.137453	48.4671	10	0
C910	19.137453	48.4671	7.75	0
C911	19.138562	48.467358	10.5	0
C912	19.138562	48.467358	7.5	0
C913	19.128911	48.460415	5.25	0
C914	19.131197	48.466033	8.75	0
C915	19.131197	48.466033	10.25	0
C916	19.131197	48.466033	10.25	0
C917	19.13159	48.466393	5.75	0
C918	19.131986	48.465676	4.75	0
C919	19.132873	48.464783	4.75	0
C920	19.132873	48.464783	5.75	0
C921	19.132873	48.464783	6.75	0
C922	19.132873	48.464783	10.75	0
C923	19.132784	48.465663	5.25	0
C924	19.135349	48.462257	12	0
C925	19.127331	48.466062	3	0
C926	19.127331	48.466062	6	0
C927	19.13281	48.46561	5.75	0
C928	19.13296	48.46603	7.75	0
C929	19.13296	48.46603	7.25	0
C930	19.13143	48.46641	3.5	0
C931	19.13143	48.46641	4	0
C932	19.13143	48.46641	5.25	0
